# Supplementary material for: ROS-generating rare-earth coordination networks for photodynamic inactivation of Candida albicans
Source: Royal Society of Chemistry journal article supplement (doi:10.1039/d0dt03926h), 2021-01-01
Supplement: d0dt03926h1.pdf [file d0dt03926h1.pdf]

Electronic Supporting Information for

**ROS-generating Rare-Earth coordination networks for photodynamic  
inactivation of *Candida albicans***

Agustín A. Godoy<sup>a</sup>, María C. Bernini<sup>a</sup>, Matías D. Funes<sup>b</sup>, Maximiliano Sortino<sup>c,d</sup>, Sebastián E. Collins<sup>e</sup> &  
Griselda E. Narda<sup>a</sup>

**a** Instituto de Investigaciones en Tecnología Química (INTEQUI), Área de Química General e Inorgánica "Dr. G. F. Puelles", Facultad de Química, Bioquímica y Farmacia, Universidad Nacional de San Luis, Ejército de los Andes 950, 5700 San Luis, Argentina.

**b** INTEQUI-CONICET, Área Química Orgánica, Facultad de Química, Bioquímica y Farmacia, Universidad Nacional de San Luis, Alente. Brown 1450, 5700 San Luis, Argentina.

**c** Farmacognosia, Facultad de Ciencias Bioquímicas y Farmacéuticas, Universidad Nacional de Rosario, Suipacha 531, 2000 Rosario, Argentina.

**d** Centro de Referencia de Micología, Facultad de Ciencias Bioquímicas y Farmacéuticas, Universidad Nacional de Rosario, Suipacha 531, 2000 Rosario, Argentina.

**e**. Instituto de Desarrollo Tecnológico para la Industria Química (INTEC), Universidad Nacional del Litoral, CONICET, Güemes 3450, S3000GLN, Santa Fe, Argentina.

**Contents**

|                   |                                                                          |    |
|-------------------|--------------------------------------------------------------------------|----|
| <b>Section S1</b> | Inductively Coupled Plasma - Atomic Emission Spectroscopy (ICP-AES)..... | 1  |
| <b>Section S2</b> | Powder X-Ray Diffraction (PXRD) Refinements .....                        | 1  |
| <b>Section S3</b> | Fourier-Transform Infrared Spectroscopy (FTIR).....                      | 2  |
| <b>Section S4</b> | Thermogravimetric Analysis (TGA).....                                    | 4  |
| <b>Section S5</b> | Scanning Electron Microscopy (SEM).....                                  | 6  |
| <b>Section S6</b> | Transmission Electron Microscopy (TEM).....                              | 7  |
| <b>Section S7</b> | Absorption and Fluorescence spectra of systems <b>I-IV</b> + Trp.....    | 10 |
| <b>Section S8</b> | Photolysis experiments of 1,3-DPBF.....                                  | 12 |

**Table S1** ICP-AES measurements of **I-IV** systems.

**Figure S1** Pawley refinements for compounds **1b** and **2b**.

**Table S2** Pawley refinement values for compounds **1b** and **2b**.

**Figure S2** FTIR spectra of compounds **1**, **1a**, **1b** and **1c**.

**Figure S3** FTIR spectra of compounds **2**, **2a**, **2b** and **2c**.

**Table S3** FTIR spectra assignment of series 1 and 2.

**Figure S4** TGA of compounds **1**, **1a**, **1b** and **1c**.

**Figure S5** TGA of compounds **2**, **2a**, **2b** and **2c**.

**Figure S6-a** SEM micrographs - Determination of aggregate size in secondary morphology.

**Figure S6-b** SEM micrographs of compounds **1b** and **2b**.

**Figure S6-c** SEM micrographs of high size single-crystals in **1c** and **2c** compounds.

**Figure S7 a-c** Transmission electron microscopy (TEM) images.

**Figure S8** Full range absorption irradiation between 260-500 nm.

**Figure S9** Full range fluorescence emission spectra of **I-IV** + Trp suspensions between 280-600 nm under excitation with 275 nm.

**Figure S10** Time-dependence of fluorescence spectra of **I-IV** + Trp suspensions in the range 320-420 nm.

**Figure S11** Photolysis experiments of 1,3-DPBF.

## Section S1 Inductively Coupled Plasma - Atomic Emission Spectroscopy (ICP-AES).

**Table S1** ICP-AES measurements of I-IV systems.

| Systems | % Y    | % Tb | [CNs]    |       | [ ] of systems I-IV in spectroscopic ROS determination experiments |
|---------|--------|------|----------|-------|--------------------------------------------------------------------|
|         |        |      | mM       | ppm   | ppm                                                                |
| I       | 100.00 | 0.00 | 1.24E-01 | 26.4  | 5.28                                                               |
| II      | 94.86  | 5.14 | 5.74E-02 | 12.67 | 2.53                                                               |
| III     | 100.00 | 0.00 | 4.41E-02 | 9.39  | 1.88                                                               |
| IV      | 94.50  | 5.50 | 5.52E-02 | 12.19 | 2.44                                                               |

## Section S2 Powder X-Ray Diffraction (PXRD) Refinements.

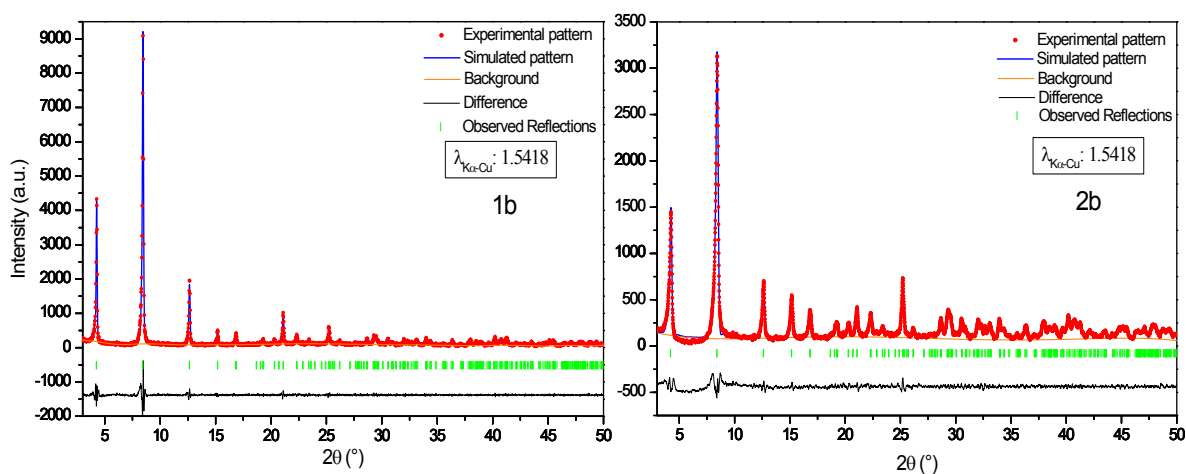

**Figure S1** Pawley refinements for compounds **1b** and **2b**.

**Table S2** Pawley refinement values for compounds **1b** and **2b**.

| Compound     | 1b         | 2b        |
|--------------|------------|-----------|
| Lattice Type | Monoclinic |           |
| Space Group  | P21/c      |           |
| Rwp          | 13.91%     | 1.46%     |
| Rp           | 10.76%     | 0.97%     |
| Parameters   |            |           |
| a            | 21.127(2)  | 21.114(2) |
| b            | 6.1010(5)  | 6.0927(5) |
| c            | 7.6282(7)  | 7.6227(6) |
| $\beta$      | 92.367(8)  | 92.439(7) |

**Section S3** Fourier-Transform Infrared Spectroscopy (FTIR).

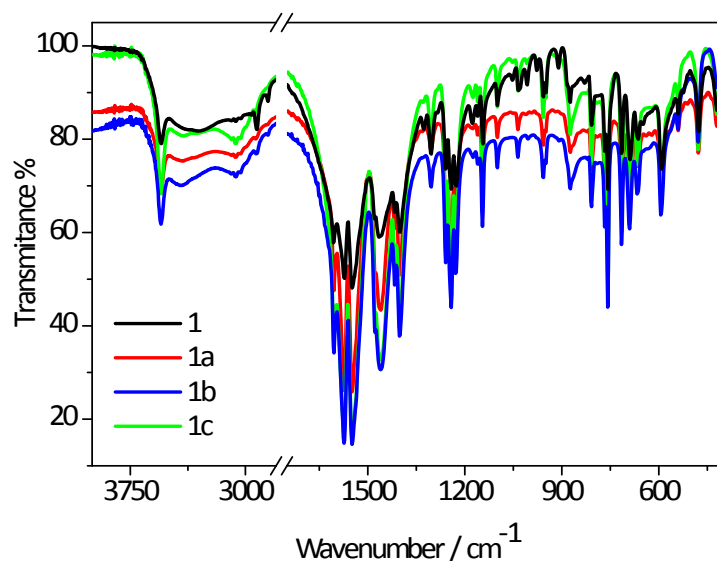

**Figure S2** FTIR spectra of compounds **1**, **1a**, **1b** and **1c**. Wavenumber range between 400 and 4000 cm<sup>-1</sup>. The spectra show the isostructural character in the series of compounds with formula  $[\text{Y}(\text{Salicylate})(\text{Succinate})_{0.5}(\text{H}_2\text{O})] + a$  mg CTAB ( $a = 0, 100, 200$  and  $400$ ) according to the functional groups present in each structure.

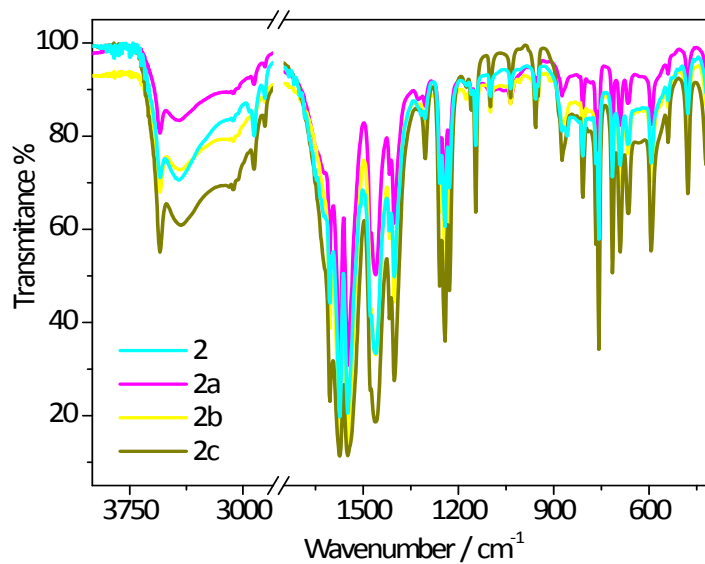

**Figure S3** FTIR spectra of compounds **2**, **2a**, **2b** and **2c**. Wavenumber range between 400 and 4000 cm<sup>-1</sup>. The spectra show the isostructural character in the series of compounds with formula  $[\text{Y}_{0.95}\text{Tb}_{0.05}(\text{Salicylate})(\text{Succinate})_{0.5}(\text{H}_2\text{O})] + a$  mg CTAB ( $a = 0, 100, 200$  and  $400$ ) according to the functional groups present in each structure.

**Table S3** FTIR spectra assignment of series 1 and 2.

| Wavenumber (cm <sup>-1</sup> ) |              |              |              |              |               |               |             | Assignment                                 |
|--------------------------------|--------------|--------------|--------------|--------------|---------------|---------------|-------------|--------------------------------------------|
| 1                              | 1a           | 1b           | 1c           | 2            | 2a            | 2b            | 2c          |                                            |
| 3548 (m)                       | 3548 (m)     | 3550 (m)     | 3548 (m)     | 3549 (m)     | 3549 (m)      | 3548 (m)      | 3549 (m)    | <b>v<sub>as</sub>OH W</b>                  |
| 3302 (br, w)                   | 3411 (br, w) | 3417 (br, w) | 3407 (br, w) | 3425 (br, w) | 3422 (br, vw) | 3419 (br, vw) | 3410 (br,w) |                                            |
| 2925 (w)                       | 2931 (vw)    | 2928 (vw)    | 2931 (vw)    | 2926 (vw)    | 2926 (vw)     | 2924 (w)      | 2926 (w)    | <b>v<sub>as</sub>C-H</b>                   |
| 1606 (w)                       | 1605 (m)      | 1605 (m)      | 1605 (m)    | <b>vCC aromatic ring</b>                   |
| 1573 (m)                       | 1573 (s)      | 1573 (s)      | 1574 (s)    | <b>v<sub>as</sub>OCO bidentate bridge</b>  |
| 1548 (m)                       | 1548 (s)      | 1548 (s)      | 1548 (s)    | <b>v<sub>as</sub>OCO quelate-bridge</b>    |
| 1463 (br,m)                    | 1461 (br,m)  | 1461 (br,m)  | 1461 (br,m)  | 1461 (br,m)  | 1461 (br,m)   | 1461 (br,m)   | 1460 (br,m) | <b>vCC aromatic ring + @CH<sub>2</sub></b> |
| 1401 (m)                       | 1401 (s)     | 1401 (s)     | 1401 (s)     | 1401 (s)     | 1402 (s)      | 1401 (s)      | 1402 (s)    | <b>v<sub>s</sub>OCO</b>                    |
| 1304 (m)                       | 1304 (m)     | 1304 (m)     | 1304 (m)     | 1304 (m)     | 1304 (m)      | 1304 (m)      | 1304 (m)    | <b>ρ<sub>w</sub>CH<sub>2</sub></b>         |
| 1241 (m)                       | 1241 (m)     | 1241 (m)     | 1241 (m)     | 1241 (m)     | 1241 (m)      | 1241 (m)      | 1241 (s)    | <b>vC-O fenoxi</b>                         |
| 1144 (m)                       | 1144 (m)     | 1144 (m)     | 1144 (m)     | 1144 (m)     | 1144 (m)      | 1144 (m)      | 1144 (m)    | <b>δCCC aromatic</b>                       |
| 757 (m)                        | 757 (m)      | 757 (m)      | 757 (m)      | 757 (m)      | 757 (m)       | 757 (m)       | 757 (s)     | <b>ρ,C-H + o-disubstitued</b>              |

**Section S4** Thermogravimetric Analysis (TGA).

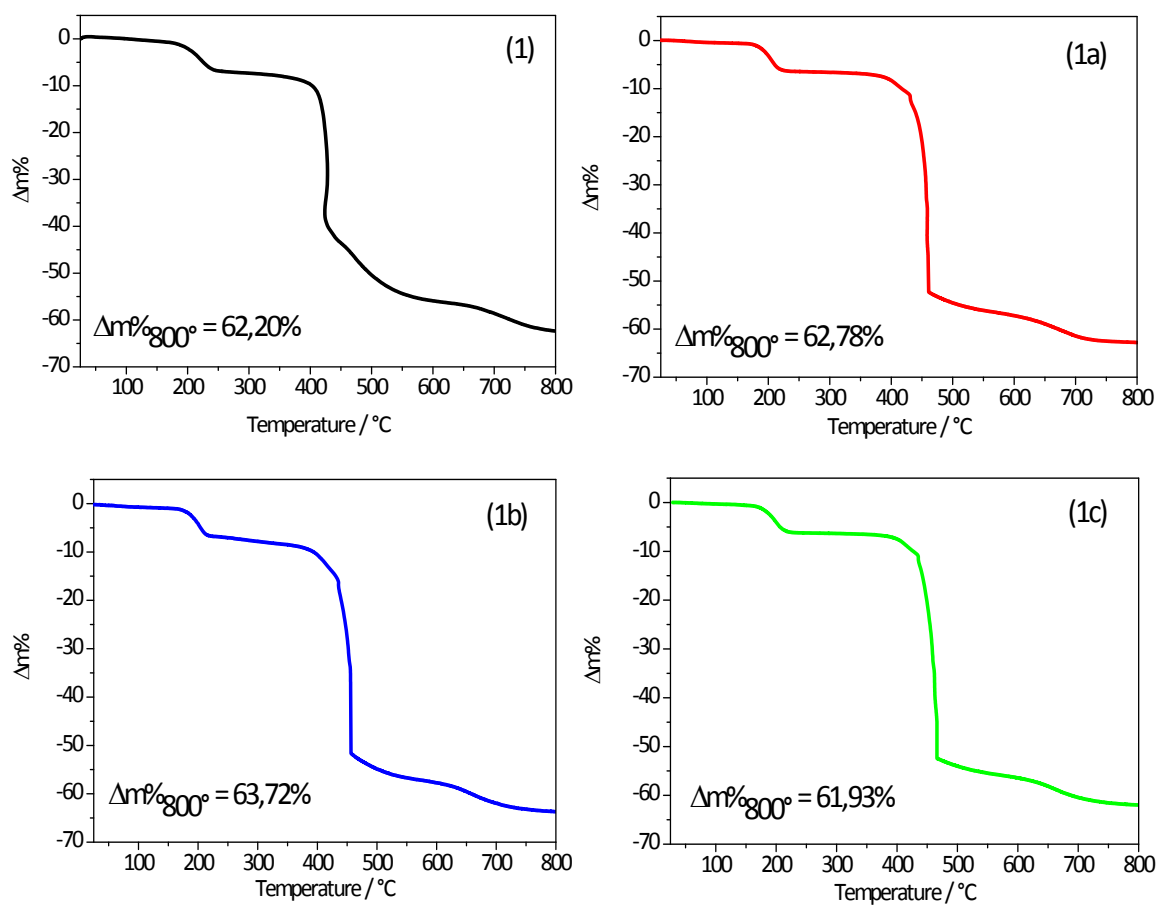

**Figure S4** TGA of compounds **1**, **1a**, **1b** and **1c**. Heating range 25 to 800  $^{\circ}\text{C}$ , air atmosphere. Heating rate 10  $^{\circ}\text{C}\cdot\text{min}^{-1}$ .

Thermogravimetric analysis shows the same decomposition events in all samples: coordinated water loss at approximately 200  $^{\circ}\text{C}$ ; decomposition of the organic structure from 450  $^{\circ}\text{C}$ ; total loss of mass at 800  $^{\circ}\text{C}$  of 60%. The isostructural character of the series was corroborated by this technique.

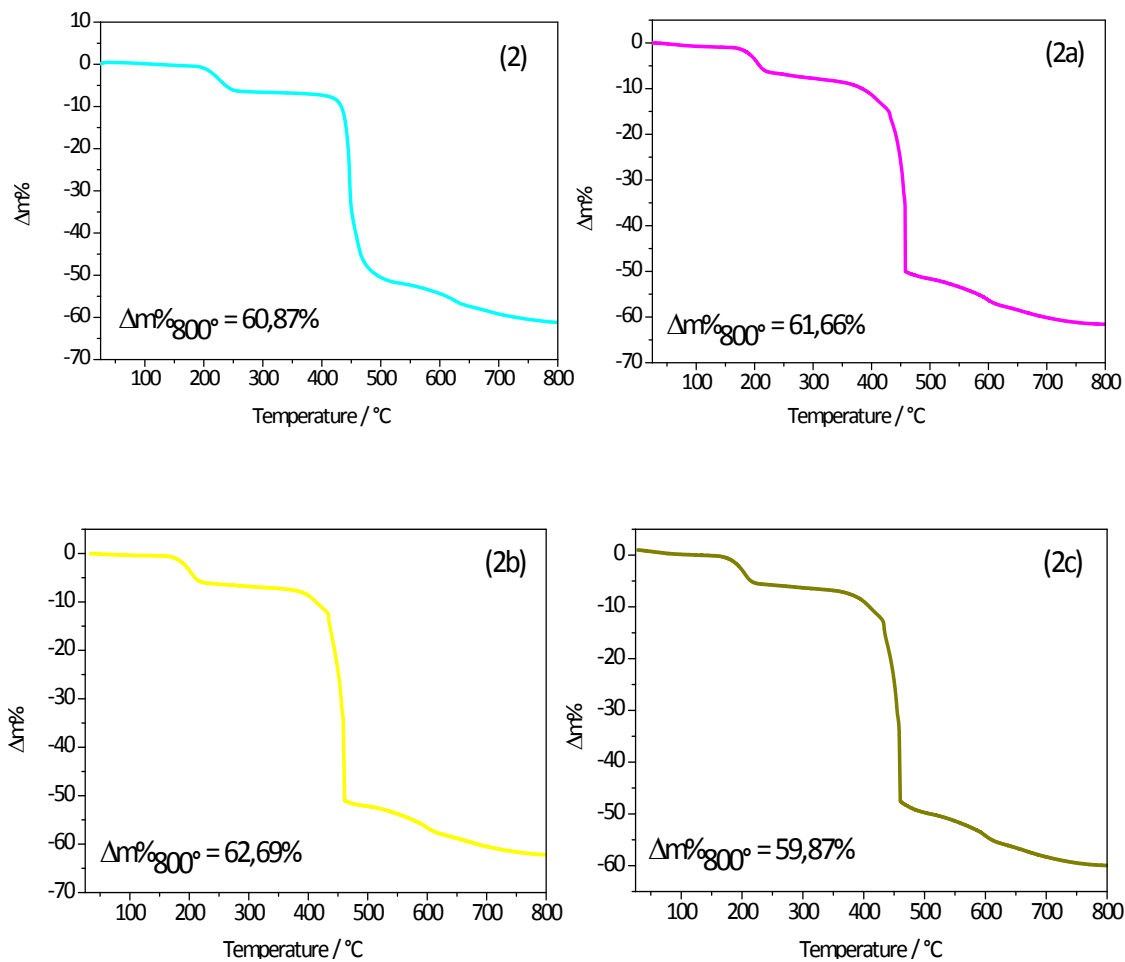

**Figure S5** TGA profiles of compounds **2**, **2a**, **2b** and **2c**. Heating range 25 to 800 ° C, air atmosphere. Heating rate 10 °C·min<sup>-1</sup>. Thermogravimetric analysis shows the same decomposition events in all samples: coordinated water loss at approximately 200 ° C; decomposition of the organic structure from 450 ° C; total loss of mass at 800 ° C of 60%. The isostructural character of the series was corroborated by this technique.

Section S5 Scanning Electron Microscopy (SEM).

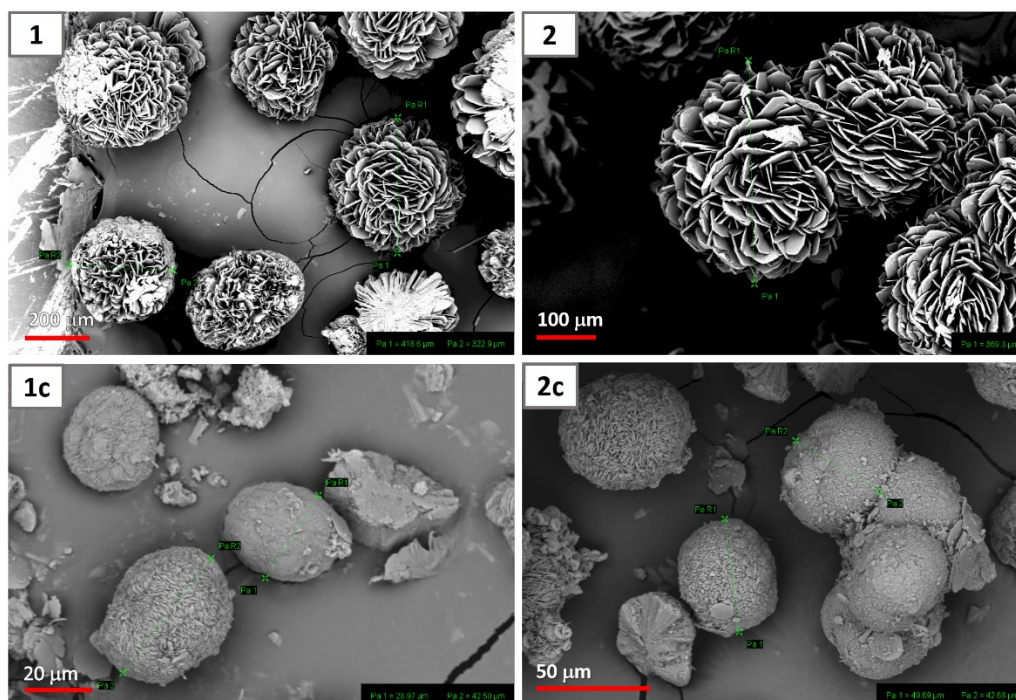

**Figure S6-a** SEM micrographs - Determination of aggregate size in secondary morphology. In these images, compounds **1** and **2** exhibit diameters in the range of 320-420 nm, while compounds **1c** and **2c** show a decrease in secondary morphology by a factor of 10, showing diameters in the range of 28 to 50 nm.

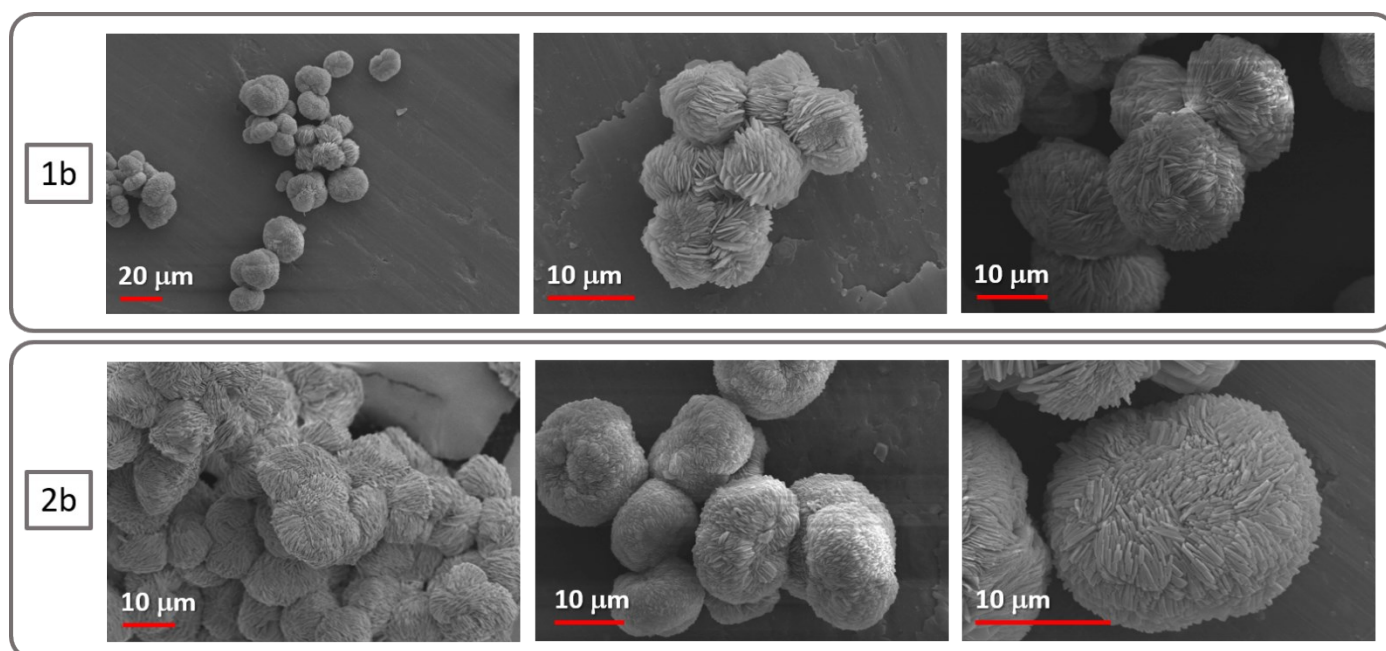

**Figure S6-b** SEM images of compounds **1b** and **2b**. Samples selected for post-synthesis treatments (top-down) and spectroscopic tests due to homogeneity in morphology and absence of secondary crystalline phases.



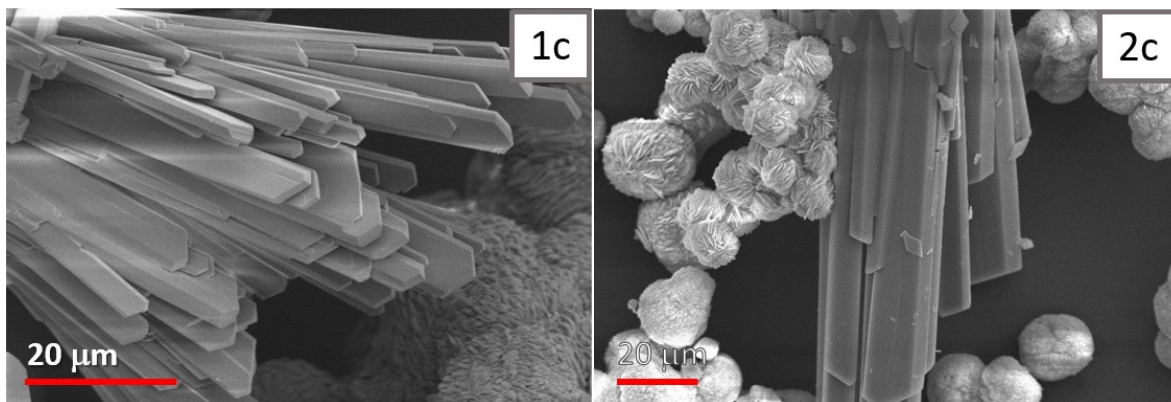

**Figure S6-c** SEM micrographs of high size single-crystals in **1c** and **2c** compounds. In addition to the primary and secondary morphologies, observed in the series of compounds **1**, **1a**, **1b**, **2**, **2a** and **2b**, the micrographs of compounds **1c** and **2c** present aggregates whose morphology corresponds to large prisms, for which they were discarded for further applied to the top-down approach.

#### Section S6 Transmission Electron Microscopy (TEM).

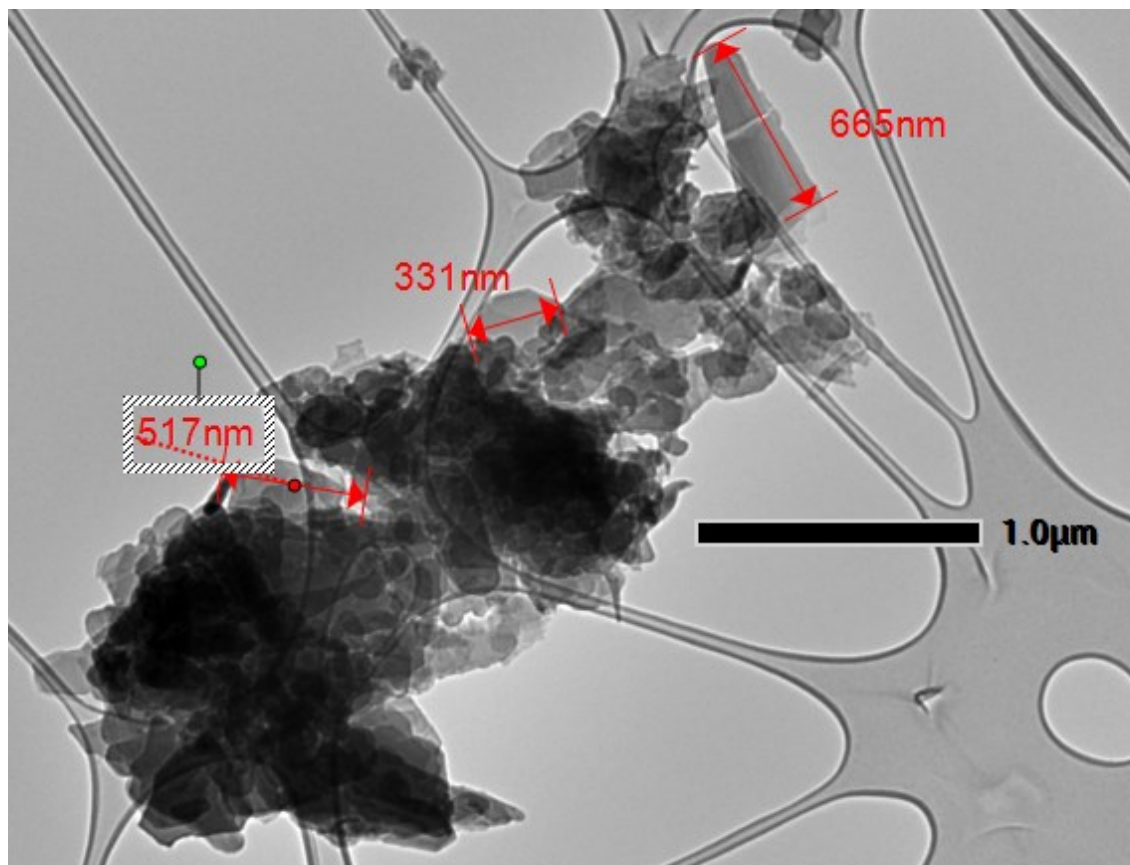

**Figure S7-a** Transmission electron microscopy (TEM) images of compound **2** resultant from 30 min of ultrasonication treatment of ethanol- suspension. Lengths and widths of selected particles are shown in red.



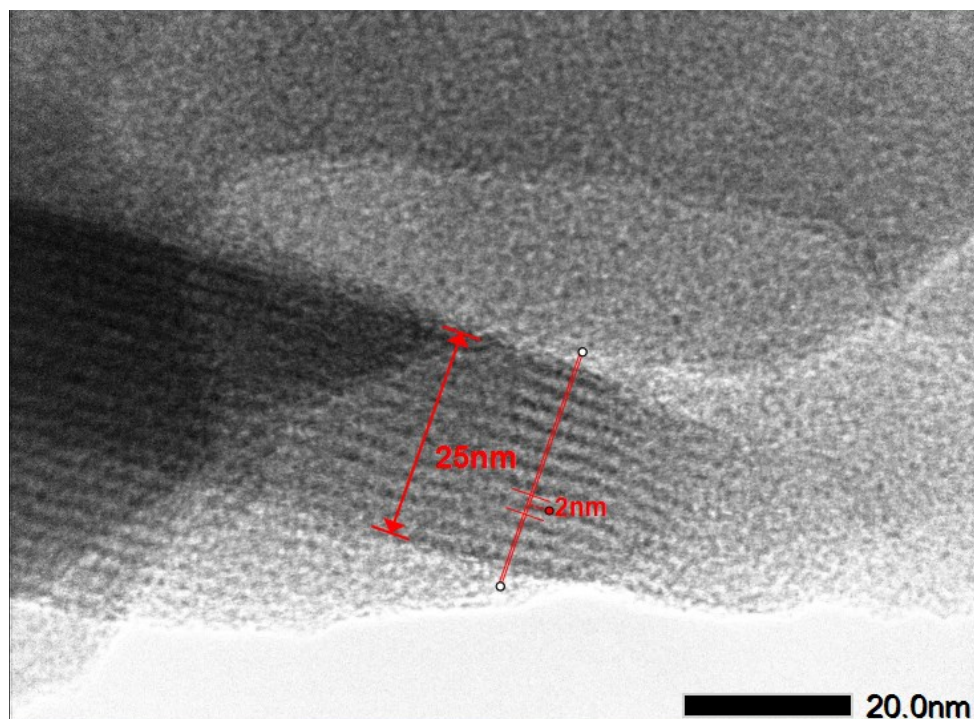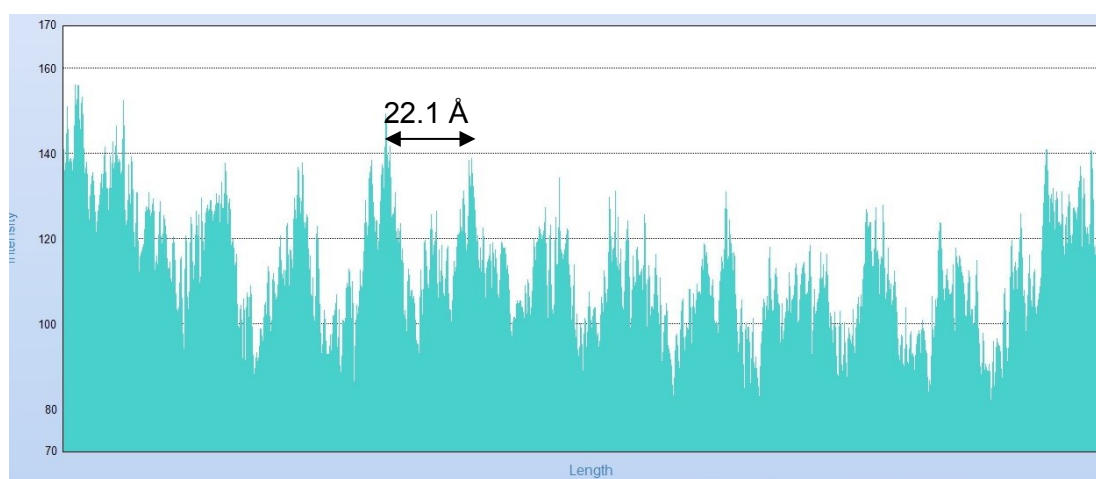

**Figure S7-b** Transmission electron microscopy (TEM) image of compound **2** (top) and intensity profile along the segment signed with red row (down).

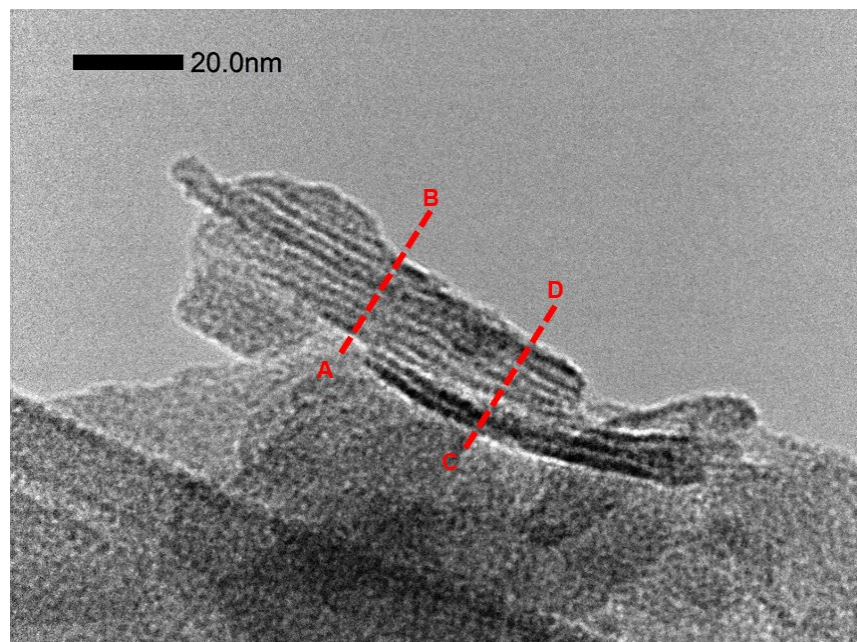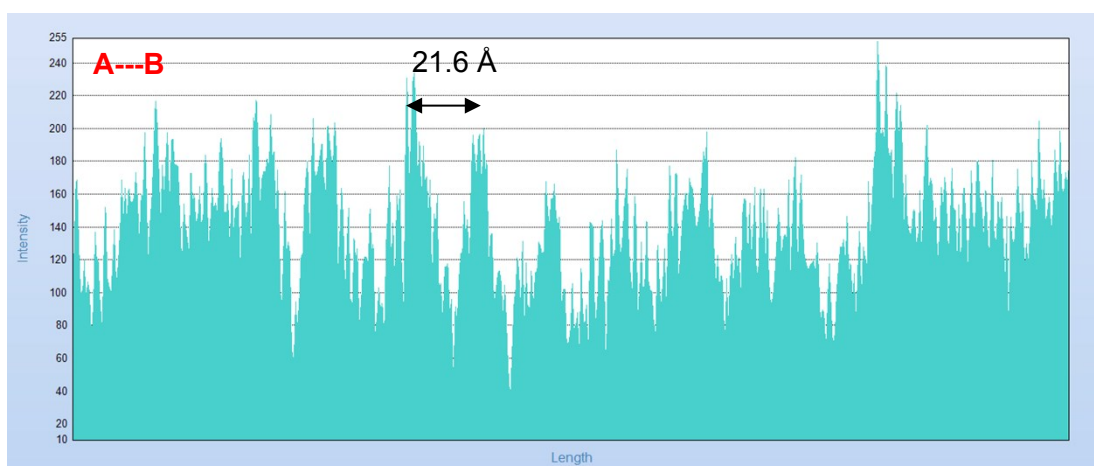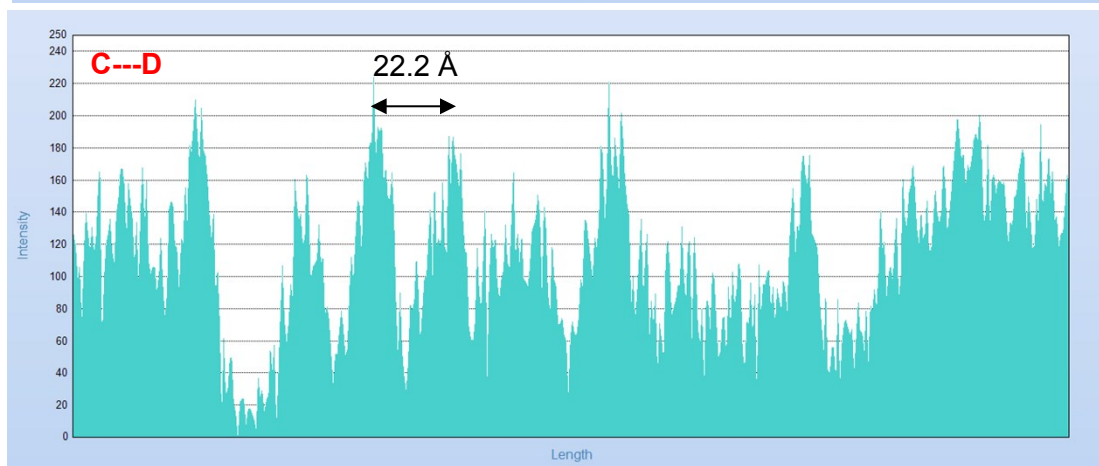

**Figure S7-c** Transmission electron microscopy image of nanoparticles of Sample **2c**. Intensity profiles along the trajectories A-B and C-D.

**Section S7** Absorption and Fluorescence spectra of I-IV + Trp suspensions.

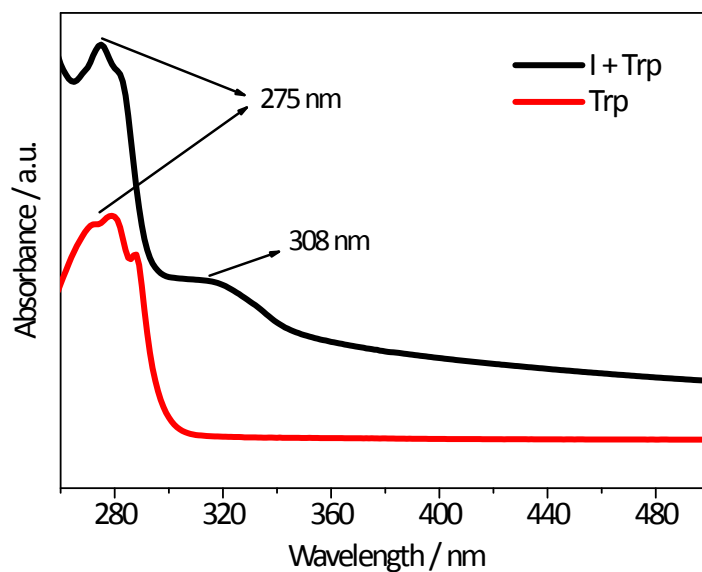

**Figure S8** Full range absorption irradiation between 260-500 nm. As an example, I + Trp system was included in the description. The characteristic absorption band of Trp is shown in both cases with a maximum centered at 275 nm, subsequently determined as the excitation wavelength for fluorescence experiments. The salicylate absorption band for system I, centered at 308 nm is shown in system I + Trp.

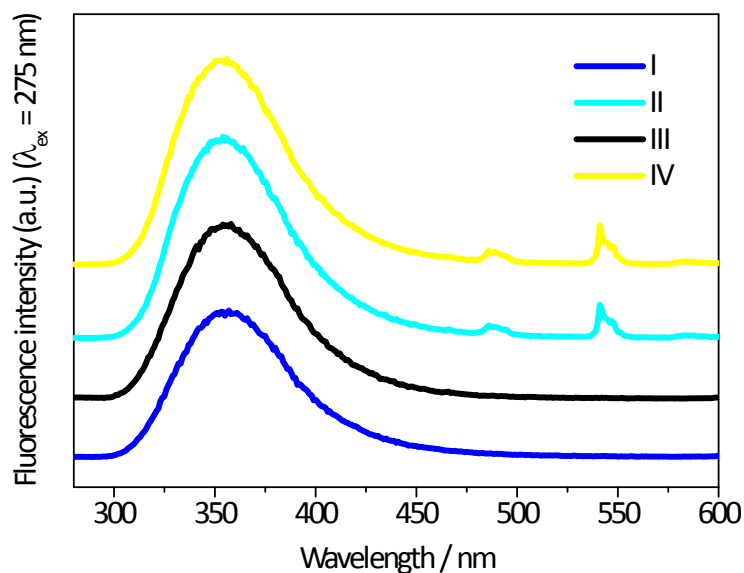

**Figure S9** Full range fluorescence emission spectra of I-IV + Trp suspensions between 280-600 nm under excitation with 275 nm. Trp characteristic emission band centered at 355 nm and  $Tb^{3+}$  ion emission bands in systems II and IV. Emission signals of the salicylate ligand cannot be seen due to overlap with the high emission band of Trp.

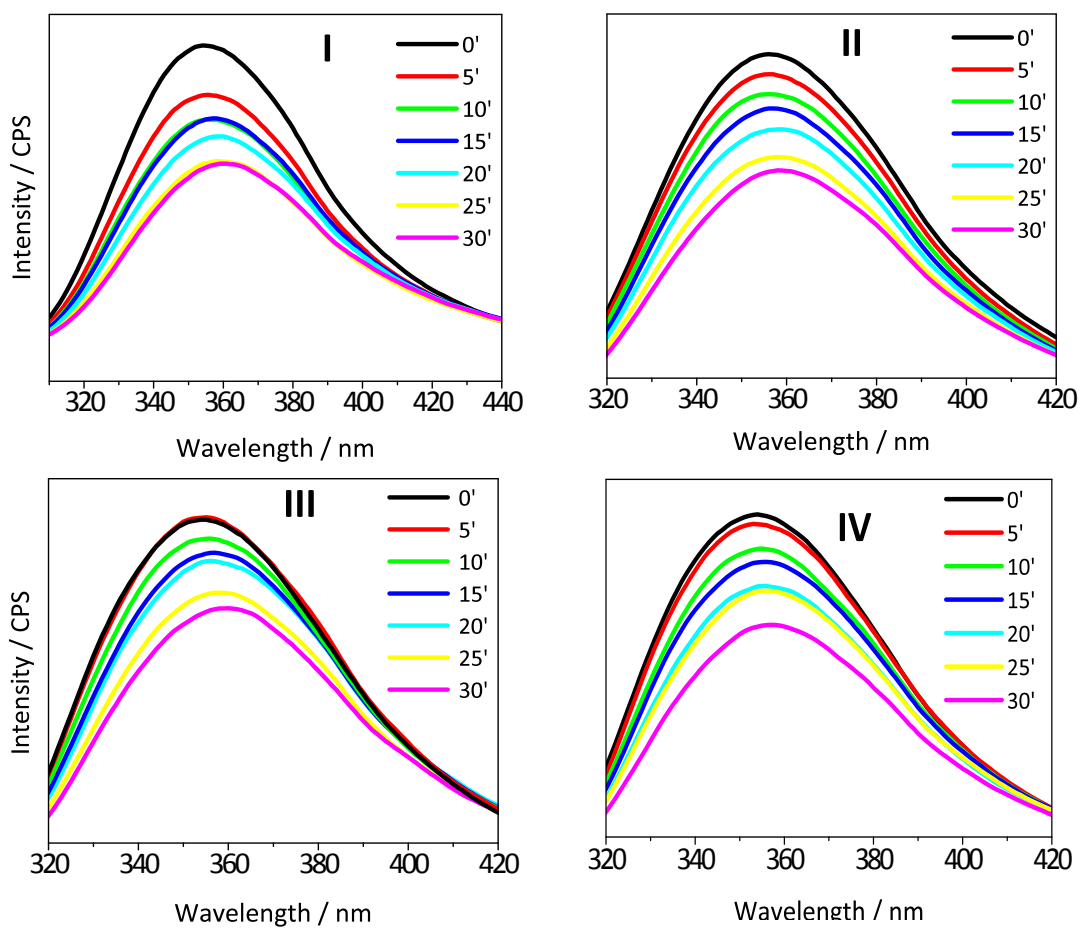

**Figure S10** Time-dependence of fluorescence spectra of I-IV + Trp suspensions in the range 320-420 nm. After irradiation with 275 nm, decreasing of maximum fluorescence band of Trp, centered in 355 nm, was monitored between 0 and 30 minutes.

Section S8 Photolysis experiments of 1,3-DPBF.

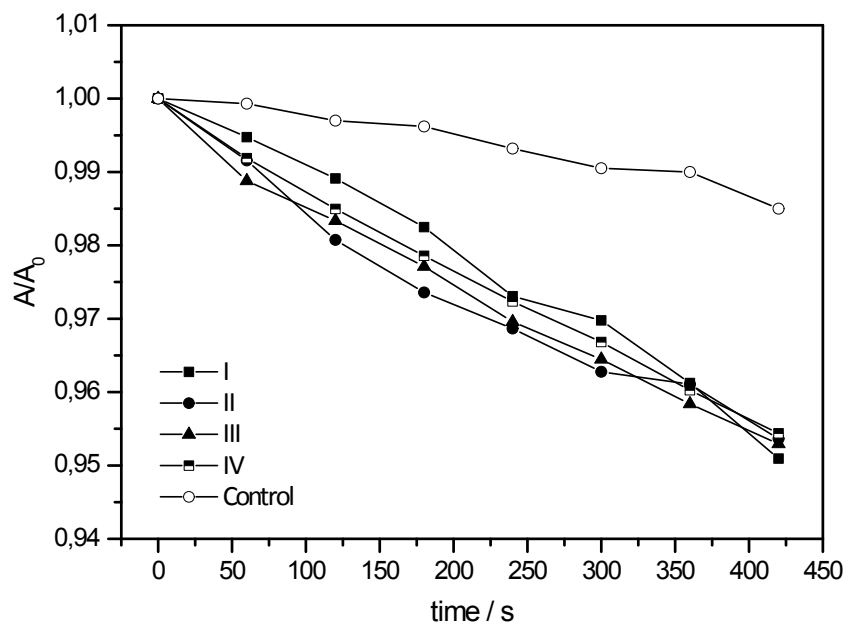

**Figure S11** Relative absorbance vs. time of 1,3-DPBF against I-IV systems. Decrease in relative absorbance, monitored at 410 nm, over a 15 minute interval. 1,3-DPBF methanol solution (2.5 ml, 50 mM) is included as a control to compare with systems I-IV.
